# Supplementary material for: Strong through-space two-halide magnetic exchange of −234 K in (2,5-dimethylpyrazine)copper(ii) bromide
Source: Royal Society of Chemistry journal article supplement (doi:10.1039/b819894b), 2009-01-01
Supplement: b819894b.pdf [file b819894b.pdf]

Previous studies (R. Caballol, O. Castell, F. Illas, I. de P. R. Moreira, J. P. Malrieu, *J. Phys. Chem. A* 1997, 101, 7860) have shown that  $J = [E(\text{SBS}) - E(\text{T})] / [1 + S_{ab}^2]$ , where  $S_{ab}$  is the overlap between the SOMO orbitals of each fragment. For through-space interactions  $S_{ab} \approx 0$  and  $J = [E(\text{SBS}) - E(\text{T})]$ . For through-bond interaction, sometimes  $S_{ab}$  is close to 1 and then  $J = [E(\text{SBS}) - E(\text{T})] / 2$ . Note that the relative order of  $J_1$ ,  $J_2$  and  $J_3$  and their assignation to the experimental values is not affected by the expressions employed, given the much smaller value of  $J_1$  in any case.
